# Supplementary material for: Intrinsic anisotropic crystallization of gold into microplates
Source: Royal Society of Chemistry journal article supplement (doi:10.1039/c5ce01615k), 2015-01-01
Supplement: c5ce01615k1.pdf [file c5ce01615k1.pdf]

## **Electronic Supplementary Information (ESI)**

### **Intrinsic anisotropic crystallization of gold into microplates**

Sanju Francis <sup>a,\*</sup>, Lalit Varshney<sup>a</sup>

#### **Experimental:**

Gold (III) chloride hydrate (Purity 99.999%) was purchased from Aldrich and Bovine serum albumin (Purity  $\geq 98$  %) was purchased from Sigma-Aldrich. Water used in all the experiments was purified by SG water system and the conductivity was less than 0.055  $\mu\text{S}/\text{cm}$ . All glasswares were washed with chromic acid and thoroughly rinsed with deionized water. Aqueous  $\text{HAuCl}_4$  solution of different concentrations was prepared in pure water. To synthesize the nanoparticles, the prepared solution was exposed to gamma radiation in a  $^{60}\text{Co}$  gamma chamber (GC 5000, BRIT, India) at a dose rate of 1.6  $\text{kGy}\cdot\text{h}^{-1}$ .

UV-Visible spectra of the solution were recorded using Thermo, Evolution 300 spectrophotometer. Scanning electron microscopy (SEM) images were recorded using SERON Technologies Inc., (Model: AIS 2100) operating at an accelerating voltage of 20 keV. X-ray powder diffraction studies were carried out with Philips X-ray diffractometer (Model PW 1729) using  $\text{Cu K}\alpha$  radiation. Selected area electron diffraction (SAED) pattern was recorded using JEOL (Model: 200 FX) electron microscope.

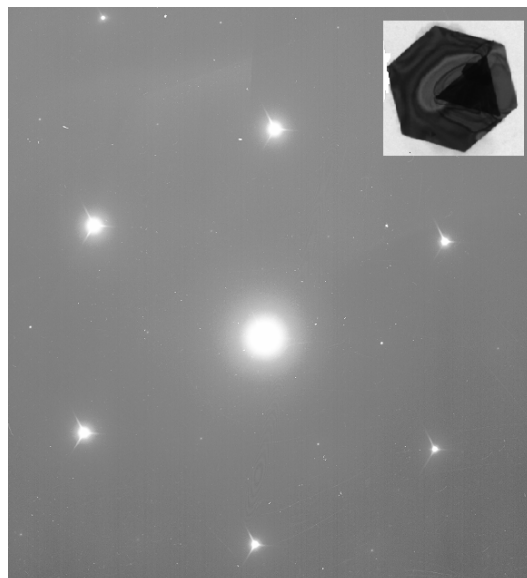

Fig. S1. SAED pattern obtained from a hexagonal microplate (inset).

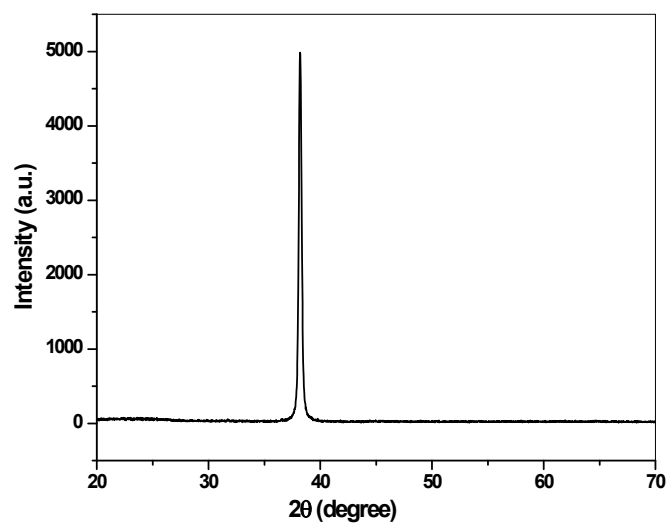

Fig. S2. XRD patterns produced by gold microplates.

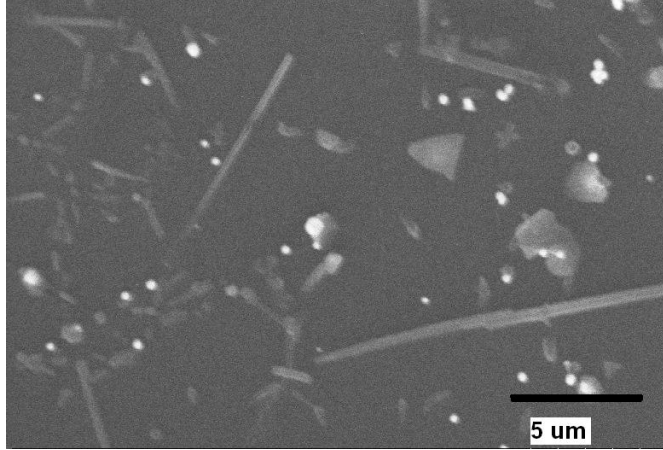

Fig. S3. SEM image recorded immediately after 1 hr of irradiation.
